# Supplementary material
Source: publisher site journal article supplement (https://www.spandidos-publications.com/4550/downloadSupplementary)
Supplement: Supplementary file 1 [file downloadSupplementary]

## Sheet: Sheet1
Table SIX. geneSummary for the BM group.
A, Summary for tissue-BM group (n=14)					B, Gene summary for tissue-BM group (n=14)											C, Summary for ctDNA-BM group (n=12)					D, Gene summary for ctDNA-BM group (n=12)
ID	summary	Mean	Median		Hugo_Symbol	Frame_Shift_Del	Frame_Shift_Ins	In_Frame_Del	Missense_Mutation	Nonsense_Mutation	Splice_Site	total	MutatedSamples	AlteredSamples		ID	summary	Mean	Median		Hugo_Symbol	In_Frame_Del	Missense_Mutation	Splice_Site	total	MutatedSamples	AlteredSamples
NCBI_Build	NA	NA	NA		TP53	1	1	0	8	0	2	12	10	10		NCBI_Build	NA	NA	NA		CD3EAP	3	0	0	3	3	3
Center	NA	NA	NA		EGFR	0	0	4	3	0	0	7	7	7		Center	NA	NA	NA		EGFR	2	0	0	2	2	2
Samples	13	NA	NA		CTNNB1	0	0	0	3	0	0	3	3	3		Samples	10	NA	NA		TP53	0	1	1	2	2	2
nGenes	12	NA	NA		CYP2D6	0	0	0	0	0	2	2	2	2		nGenes	10	NA	NA		TPMT	0	2	0	2	2	2
Frame_Shift_Del	1	0.077	0		APC	0	0	0	1	0	0	1	1	1		In_Frame_Del	5	0.5	0.5		ALK	0	1	0	1	1	1
Frame_Shift_Ins	1	0.077	0		CD3EAP	0	0	1	0	0	0	1	1	1		Missense_Mutation	9	0.9	0.5		CDA	0	1	0	1	1	1
In_Frame_Del	5	0.385	0		DPYD	0	0	0	1	0	0	1	1	1		Splice_Site	1	0.1	0		CTNNB1	0	1	0	1	1	1
Missense_Mutation	20	1.538	1		KRAS	0	0	0	1	0	0	1	1	1		total	15	1.5	1		DPYD	0	1	0	1	1	1
Nonsense_Mutation	1	0.077	0		RB1	0	0	0	0	1	0	1	1	1							NRAS	0	1	0	1	1	1
Splice_Site	4	0.308	0		SMAD4	0	0	0	1	0	0	1	1	1							VHL	0	1	0	1	1	1
total	32	2.462	3		SOD2	0	0	0	1	0	0	1	1	1
					TERT	0	0	0	1	0	0	1	1	1
